# Supplementary material
Source: PubMed Central journal article supplement (PMC1472427)

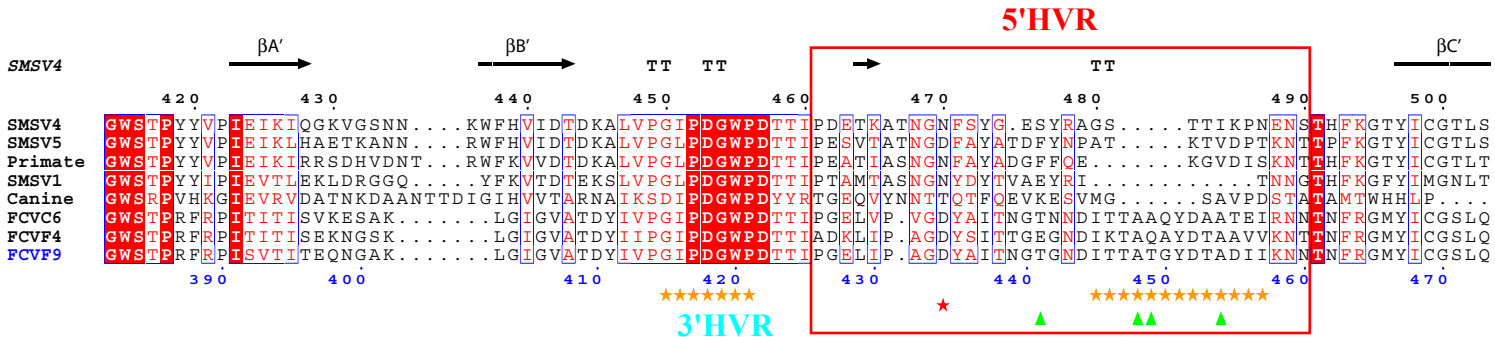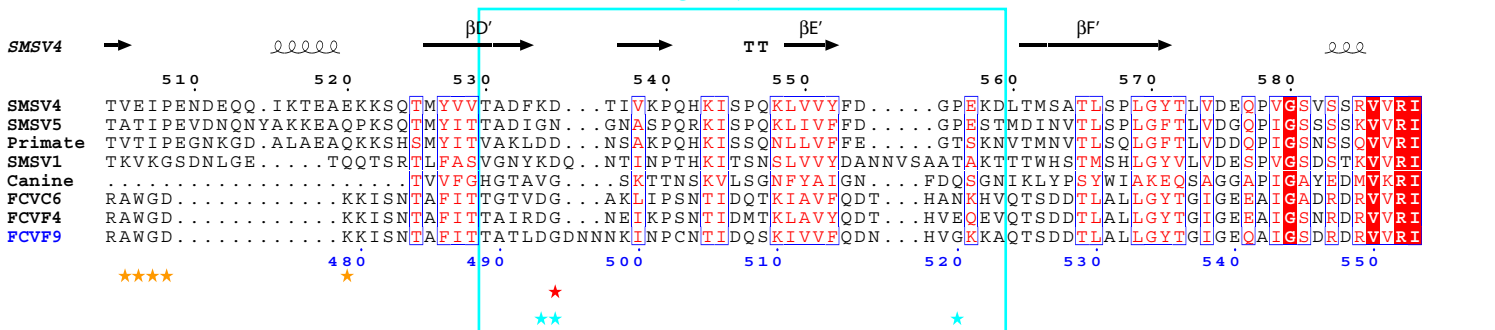

Supplement: pnas_0600421103_2.pdf [file pnas_0600421103_2.pdf]
